# Supplementary material for: Polymorphism and chiral expression in two-dimensional subphthalocyanine crystals on Au(111)
Source: Royal Society of Chemistry journal article supplement (doi:10.1039/b918278k), 2009-12-10

## Polymorphism and chiral expression in two-dimensional subphthalocyanine crystals on Au(111)

Nan Jiang,<sup>a</sup> Yeliang Wang,<sup>a</sup> Qi Liu,<sup>a</sup> Yuyang Zhang,<sup>a</sup> Zhitao Deng, Karl-Heinz Ernst<sup>\*b</sup> and Hong-Jun Gao<sup>\*a</sup>

<sup>a</sup> Beijing National Laboratory of Condensed Matter Physics, Institute of Physics, Chinese Academy of Sciences, Beijing 100190, PR China.

<sup>b</sup> Nanoscale Materials Science Laboratory, Empa - Swiss Federal Laboratories for Materials Research (EMPA), Überlandstrasse 129, CH-8600 Dübendorf, Switzerland.

E-mail: : [hjgao@iphy.ac.cn](mailto:hjgao@iphy.ac.cn); [karl-heinz.ernst@empa.ch](mailto:karl-heinz.ernst@empa.ch)

### A: Long-range STM images of diamond and intermediate phase

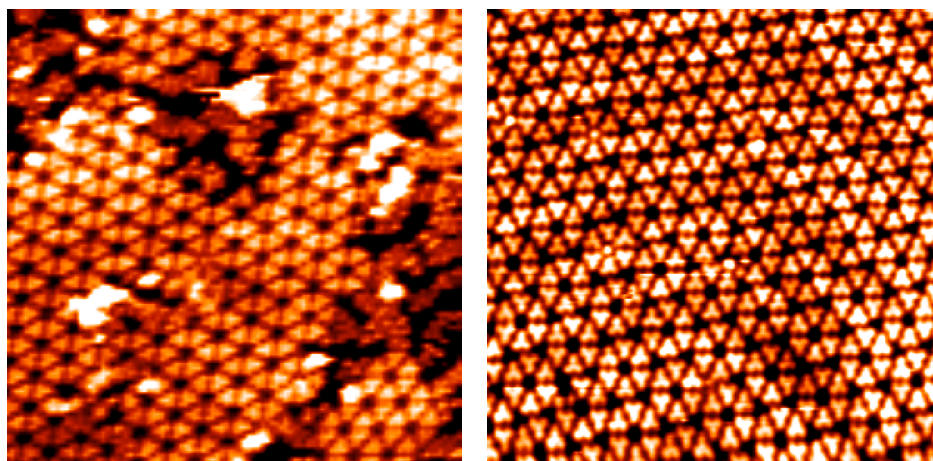

**SFig. 1** STM images of the diamond structure (left, 32 nm x 32 nm,  $V = -2$  V,  $I = 0.1$  nA) and “intermediate” structure (right, 32 nm x 32 nm,  $V = -2$  V,  $I = 0.1$  nA) acquired from the same sample, but at different position on the surface.

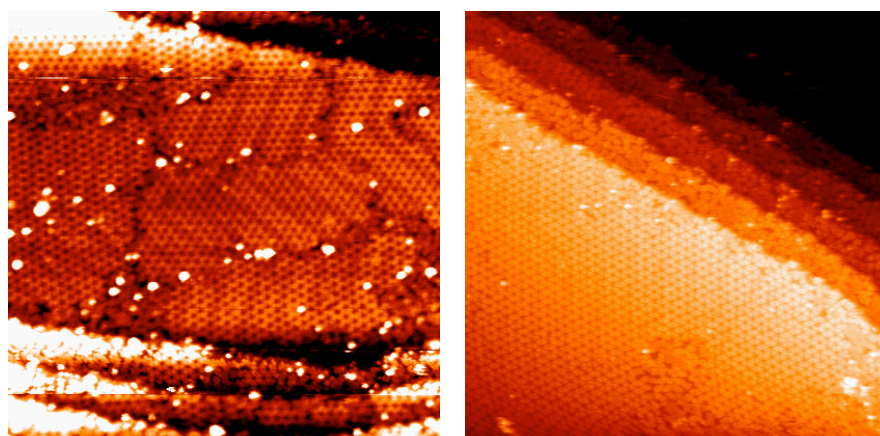

**SFig. 2** STM images (100 nm x 100 nm,  $U = 2$  V,  $I = 100$  pA) of the diamond phase (left) and the intermediate phase (right) acquired from the same sample, but at different position on the surface. The diamond phase has many domains on a single terrace, while in the intermediate phase a whole terrace is covered by a single domain.

## B: Unit cells of structures

### 1. Honeycomb structure

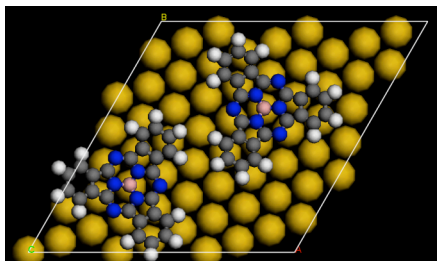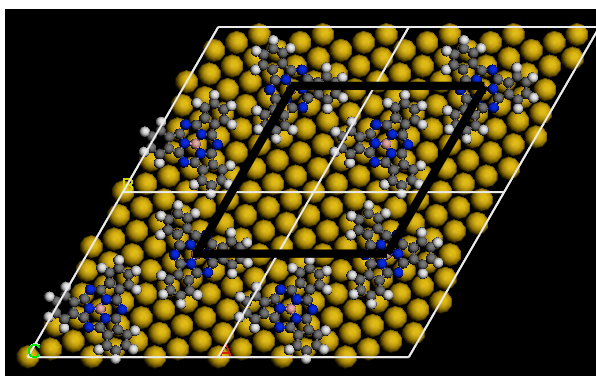

### 2. Diamond structure

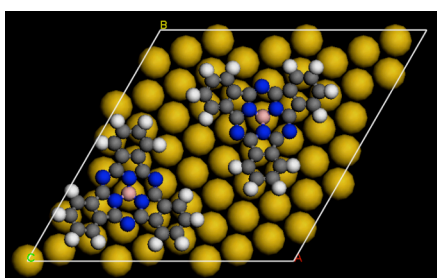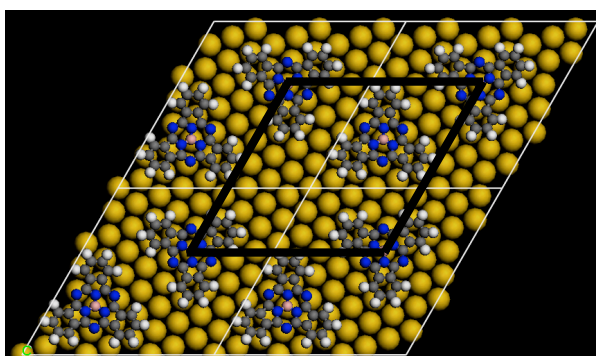

### 3. Intermediate structure

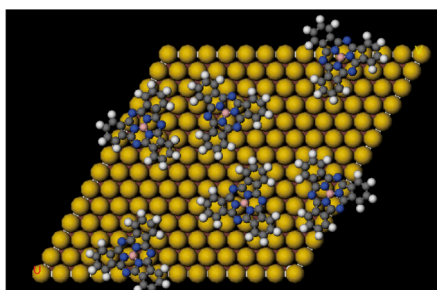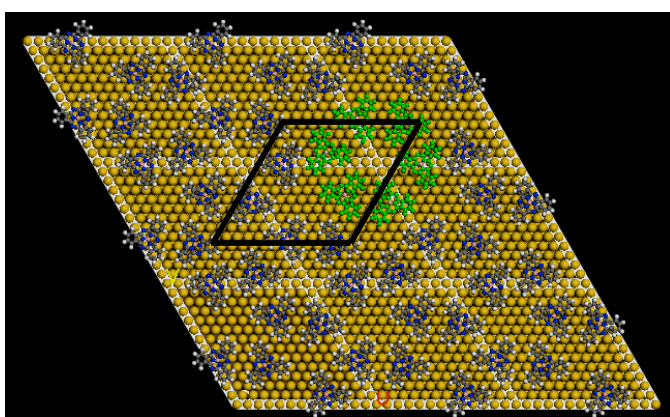

#### 4. Hexagonal closed-packed (hcp) structure

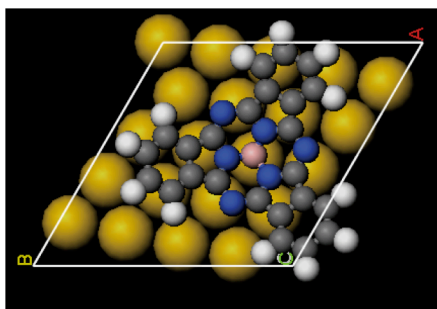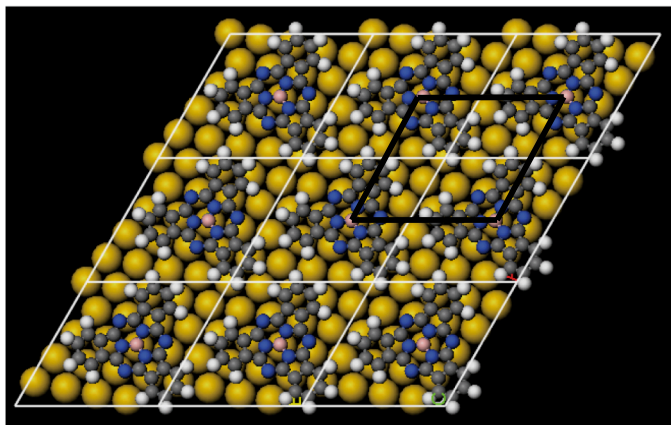

Supplement: b918278k.pdf [file b918278k.pdf]
